# Supplementary material for: Association of internalised homonegativity with partner notification after diagnosis of syphilis or gonorrhoea among men having sex with men in 49 countries across four continents
Source: PubMed Central journal article supplement (PMC9809117; doi:10.1186/s12889-022-14891-2), 2023-01-03
Supplement: 12889_2022_14891_MOESM2_ESM.pdf [file 12889_2022_14891_MOESM2_ESM.pdf]

**Supplemental Table S2:** Self-reported rates of syphilis and gonorrhoea partner notification (PN) in EMIS and LAMIS countries, sorted by syphilis PN in three country groups

| Country                                                  | Syphilis partner notification |              |              |                  |              |              | Gonorrhoea partner notification |              |              |                  |              |              |        |
|----------------------------------------------------------|-------------------------------|--------------|--------------|------------------|--------------|--------------|---------------------------------|--------------|--------------|------------------|--------------|--------------|--------|
|                                                          | None                          | Yes, some    | Yes, all     | I don't remember | Total        | Valid %      | None                            | Yes, some    | Yes, all     | I don't remember | Total        | Valid %      |        |
| North- & Central-western European countries & Canada     | Canada                        | 18           | 58           | 124              | 7            | 207          | 91.0%                           | 49           | 141          | 234              | 8            | 432          | 88.4%  |
|                                                          | United Kingdom                | 38           | 143          | 168              | 10           | 359          | 89.1%                           | 121          | 346          | 446              | 22           | 935          | 86.7%  |
|                                                          | Netherlands                   | 25           | 76           | 97               | 2            | 200          | 87.4%                           | 36           | 166          | 168              | 5            | 375          | 90.3%  |
|                                                          | Norway                        | 6            | 12           | 25               | 1            | 44           | 86.0%                           | 9            | 62           | 56               | 2            | 129          | 92.9%  |
|                                                          | Switzerland <sup>1</sup>      | 14           | 45           | 35               | 2            | 96           | 85.1%                           | 27           | 69           | 61               | 4            | 161          | 82.8%  |
|                                                          | Austria                       | 12           | 34           | 33               | 1            | 80           | 84.8%                           | 13           | 38           | 52               | 3            | 106          | 87.4%  |
|                                                          | Finland                       | 3            | 6            | 9                | 0            | 18           | 83.3%                           | 7            | 9            | 29               | 0            | 45           | 84.4%  |
|                                                          | Belgium <sup>1</sup>          | 21           | 53           | 50               | 1            | 125          | 83.1%                           | 23           | 50           | 47               | 4            | 124          | 80.8%  |
|                                                          | Ireland                       | 11           | 28           | 22               | 5            | 66           | 82.0%                           | 38           | 70           | 71               | 6            | 185          | 78.8%  |
|                                                          | Sweden                        | 10           | 15           | 28               | 0            | 53           | 81.1%                           | 9            | 56           | 83               | 0            | 148          | 93.9%  |
|                                                          | Germany                       | 147          | 282          | 308              | 16           | 753          | 80.1%                           | 185          | 363          | 397              | 27           | 972          | 80.4%  |
| Denmark                                                  | 10                            | 24           | 16           | 2                | 52           | 80.0%        | 13                              | 52           | 49           | 1                | 115          | 88.6%        |        |
| Former socialist countries                               | Slovakia                      | 1            | 3            | 7                | 1            | 12           | 90.9%                           | 1            | 2            | 15               | 1            | 19           | 94.4%  |
|                                                          | Hungary                       | 8            | 16           | 33               | 1            | 58           | 86.0%                           | 13           | 8            | 30               | 1            | 52           | 74.5%  |
|                                                          | Czech Republic                | 8            | 15           | 26               | 1            | 50           | 83.7%                           | 11           | 17           | 38               | 4            | 70           | 83.3%  |
|                                                          | Poland                        | 28           | 48           | 89               | 8            | 173          | 83.0%                           | 27           | 27           | 43               | 6            | 103          | 72.2%  |
|                                                          | Serbia                        | 5            | 6            | 13               | 0            | 24           | 79.2%                           | 1            | 4            | 5                | 0            | 10           | 90.0%  |
|                                                          | Romania                       | 11           | 11           | 25               | 5            | 52           | 76.6%                           | 10           | 7            | 18               | 3            | 38           | 71.4%  |
|                                                          | Slovenia                      | 4            | 4            | 9                | 0            | 17           | 76.5%                           | 4            | 5            | 8                | 0            | 17           | 76.5%  |
|                                                          | Bulgaria                      | 9            | 15           | 14               | 3            | 41           | 76.3%                           | 9            | 9            | 11               | 1            | 30           | 69.0%  |
|                                                          | Russia                        | 63           | 59           | 77               | 9            | 208          | 68.3%                           | 40           | 31           | 50               | 5            | 126          | 66.9%  |
|                                                          | Croatia                       | 4            | 4            | 3                | 0            | 11           | 63.6%                           | 0            | 9            | 11               | 0            | 20           | 100.0% |
|                                                          | Ukraine                       | 11           | 5            | 10               | 2            | 28           | 57.7%                           | 3            | 7            | 10               | 2            | 22           | 85.0%  |
| Latin-American/Mediterranean countries & the Philippines | Greece                        | 26           | 41           | 30               | 2            | 99           | 73.2%                           | 10           | 23           | 32               | 1            | 66           | 84.6%  |
|                                                          | Turkey                        | 14           | 20           | 15               | 2            | 51           | 71.4%                           | 42           | 41           | 31               | 6            | 120          | 63.2%  |
|                                                          | Italy*                        | 114          | 131          | 151              | 8            | 404          | 71.2%                           | 65           | 84           | 93               | 5            | 247          | 73.1%  |
|                                                          | Spain                         | 167          | 183          | 207              | 12           | 569          | 70.0%                           | 191          | 203          | 218              | 24           | 636          | 68.8%  |
|                                                          | Portugal                      | 53           | 60           | 54               | 4            | 171          | 68.3%                           | 33           | 42           | 66               | 8            | 149          | 76.6%  |
|                                                          | Venezuela                     | 28           | 25           | 35               | 1            | 89           | 68.2%                           | 11           | 12           | 7                | 1            | 31           | 63.3%  |
|                                                          | France <sup>1</sup>           | 13           | 11           | 16               | 3            | 43           | 67.5%                           | 8            | 15           | 16               | 2            | 41           | 79.5%  |
|                                                          | Panama                        | 18           | 18           | 18               | 1            | 55           | 66.7%                           | 15           | 8            | 7                | 1            | 31           | 50.0%  |
|                                                          | Israel                        | 12           | 9            | 14               | 0            | 35           | 65.7%                           | 23           | 28           | 28               | 0            | 79           | 70.9%  |
|                                                          | Brazil                        | 653          | 549          | 657              | 57           | 1,916        | 64.9%                           | 318          | 172          | 266              | 17           | 773          | 57.9%  |
|                                                          | Argentina                     | 138          | 112          | 111              | 12           | 373          | 61.8%                           | 77           | 38           | 59               | 4            | 178          | 55.7%  |
|                                                          | Costa Rica                    | 26           | 21           | 19               | 2            | 68           | 60.6%                           | 24           | 14           | 15               | 2            | 55           | 54.7%  |
|                                                          | Guatemala                     | 25           | 17           | 19               | 5            | 66           | 59.0%                           | 16           | 12           | 18               | 2            | 48           | 65.2%  |
|                                                          | Nicaragua                     | 5            | 4            | 3                | 1            | 13           | 58.3%                           | 9            | 3            | 0                | 0            | 12           | 25.0%  |
|                                                          | Peru                          | 51           | 43           | 24               | 6            | 124          | 56.8%                           | 49           | 19           | 24               | 4            | 96           | 46.7%  |
|                                                          | Chile                         | 141          | 90           | 92               | 11           | 334          | 56.3%                           | 88           | 39           | 50               | 6            | 183          | 50.3%  |
|                                                          | Colombia                      | 296          | 193          | 180              | 28           | 697          | 55.8%                           | 177          | 97           | 98               | 10           | 382          | 52.4%  |
|                                                          | Cyprus                        | 4            | 1            | 4                | 1            | 10           | 55.6%                           | 2            | 6            | 3                | 0            | 11           | 81.8%  |
|                                                          | El Salvador                   | 16           | 10           | 10               | 2            | 38           | 55.6%                           | 6            | 0            | 6                | 0            | 12           | 50.0%  |
|                                                          | Mexico                        | 320          | 185          | 166              | 34           | 705          | 52.3%                           | 229          | 130          | 124              | 13           | 496          | 52.6%  |
| Ecuador                                                  | 35                            | 14           | 24           | 2                | 75           | 52.1%        | 25                              | 14           | 11           | 4                | 54           | 50.0%        |        |
| Honduras                                                 | 11                            | 7            | 4            | 1                | 23           | 50.0%        | 4                               | 4            | 7            | 0                | 15           | 73.3%        |        |
| Uruguay                                                  | 8                             | 4            | 4            | 2                | 18           | 50.0%        | 4                               | 7            | 6            | 0                | 17           | 76.5%        |        |
| Paraguay                                                 | 38                            | 14           | 18           | 4                | 74           | 45.7%        | 8                               | 3            | 4            | 3                | 18           | 46.7%        |        |
| Philippines                                              | 30                            | 14           | 6            | 2                | 52           | 40.0%        | 47                              | 21           | 42           | 6                | 116          | 57.3%        |        |
| Bolivia                                                  | 30                            | 6            | 6            | 3                | 45           | 28.6%        | 19                              | 14           | 7            | 2                | 42           | 52.5%        |        |
| Countries excluded due to small numbers                  | Estonia <sup>2</sup>          | 1            | 0            | 3                | 0            | 4            |                                 | 1            | 0            | 2                | 0            | 3            |        |
|                                                          | Latvia <sup>2</sup>           | 2            | 1            | 3                | 1            | 7            |                                 | 0            | 0            | 3                | 0            | 3            |        |
|                                                          | Lithuania <sup>2</sup>        | 1            | 1            | 1                | 1            | 4            |                                 | 0            | 0            | 1                | 0            | 1            |        |
|                                                          | Luxembourg <sup>2</sup>       | 0            | 2            | 0                | 1            | 3            |                                 | 1            | 0            | 3                | 0            | 4            |        |
|                                                          | Malta <sup>2</sup>            | 0            | 5            | 3                | 1            | 9            |                                 | 3            | 8            | 6                | 0            | 17           |        |
|                                                          | Iceland <sup>2</sup>          | 0            | 3            | 0                | 0            | 3            |                                 | 0            | 3            | 3                | 0            | 6            |        |
|                                                          | Bosnia i H <sup>2</sup>       | 0            | 0            | 0                | 0            | 0            |                                 | 0            | 1            | 0                | 0            | 1            |        |
|                                                          | North Macedonia <sup>2</sup>  | 1            | 0            | 0                | 0            | 1            |                                 | 0            | 1            | 0                | 0            | 1            |        |
|                                                          | Albania-Kosovo-               | 0            | 1            | 2                | 0            | 3            |                                 | 2            | 3            | 2                | 0            | 7            |        |
|                                                          | Belarus <sup>2</sup>          | 5            | 0            | 3                | 0            | 8            |                                 | 3            | 6            | 4                | 2            | 15           |        |
|                                                          | Lebanon <sup>2</sup>          | 1            | 2            | 2                | 0            | 5            |                                 | 3            | 2            | 7                | 0            | 12           |        |
|                                                          | Moldova <sup>2</sup>          | 6            | 14           | 8                | 1            | 29           |                                 | 1            | 3            | 1                | 0            | 5            |        |
|                                                          | Suriname <sup>2</sup>         | 3            | 5            | 4                | 0            | 12           |                                 | 1            | 2            | 0                | 0            | 3            |        |
| <b>Total</b>                                             | <b>2,759</b>                  | <b>2,778</b> | <b>3,137</b> | <b>288</b>       | <b>8,962</b> | <b>68.2%</b> | <b>2,164</b>                    | <b>2,626</b> | <b>3,202</b> | <b>228</b>       | <b>8,220</b> | <b>72.9%</b> |        |

<sup>1</sup>French questionnaire excluded; <sup>2</sup>Fewer than ten respondents with diagnosed syphilis or gonorrhoea

Supplement to: Marcus U, Jonas K, Berg R, Veras MA, Caceres CF, Casabona J, Schink SB, Schmidt AJ. Association of internalised homonegativity with partner notification after diagnosis of syphilis or gonorrhoea among men having sex with men in 49 countries across four continents. *BMC Public Health*. 2022
